# Supplementary material for: Propionibacterium-Produced Coproporphyrin III Induces Staphylococcus aureus Aggregation and Biofilm Formation
Source: PubMed Central journal article supplement — mBio. 2014 Jul 22;5(4):e01286-14. doi: 10.1128/mBio.01286-14 (PMC4120196; doi:10.1128/mbio.01286-14), 2014-07-22
Supplement: mbo004141915st1.pdf [file mbo004141915st1.pdf]

**Table S1:** Species-typing for primary nostril KPL *Propionibacterium* isolates.

| Isolate                                      | Aerobic Growth in BHI | Growth on 20% Bile Salts Agar | Hydrolysis of esculin | Production of indole | rpoB match <sup>a</sup>                    | 16S match <sup>b</sup>             | Species designation  |
|----------------------------------------------|-----------------------|-------------------------------|-----------------------|----------------------|--------------------------------------------|------------------------------------|----------------------|
| KPL1844                                      | No                    | Robust growth                 | No                    | No                   | 90% identity <i>P. avidum</i> <sup>c</sup> | 99% identity <i>P. granulosum</i>  | <i>P. granulosum</i> |
| <i>Propionibacterium granulosum</i> DSM20700 | No                    | Robust growth                 | No                    | No                   | 90% identity <i>P. avidum</i> <sup>c</sup> | 100% identity <i>P. granulosum</i> | ""                   |
| KPL1849 <sup>d</sup>                         | No                    | Very light growth             | No                    | Yes                  | 97-99% identity <i>P. acnes</i>            | 99% identity <i>P. acnes</i>       | <i>P. acnes</i>      |
| <i>Propionibacterium acnes</i> KPA171202     | No                    | Very light growth             | No                    | Yes                  | 97-99% identity <i>P. acnes</i>            | 100% identity <i>P. acnes</i>      | ""                   |
| <i>Propionibacterium avidum</i> DSM4901      | Yes                   | Moderate growth               | Yes                   | No                   | 99% identity <i>P. avidum</i>              | 99% identity <i>P. avidum</i>      | <i>P. avidum</i>     |

<sup>a</sup> *rpoB* sequence length searched was approximately 900 nt.

<sup>b</sup> 16S sequence length searched was approximately 1450 nt.

<sup>c</sup> There is currently no *rpoB* sequence for a named *P. granulosum* isolated in GenBank.

<sup>d</sup> KPL1849 was isolated from a different nostril than KPL1844.
