# Supplementary figures and images for: Propionibacterium-Produced Coproporphyrin III Induces Staphylococcus aureus Aggregation and Biofilm Formation
Source: PubMed Central journal article supplement — mBio. 2014 Jul 22;5(4):e01286-14. doi: 10.1128/mBio.01286-14 (PMC4120196; doi:10.1128/mbio.01286-14), 2014-07-22

**Porphobilinogen**

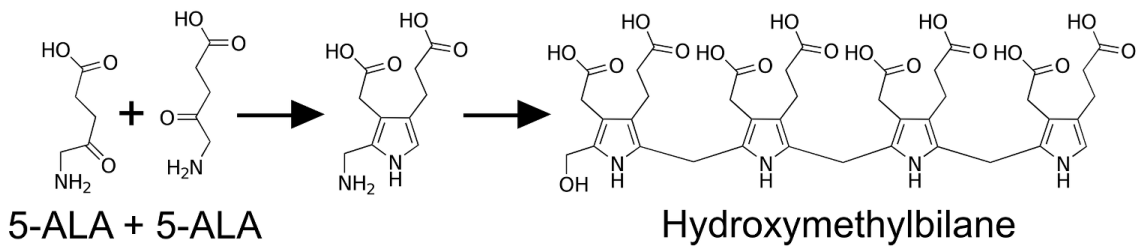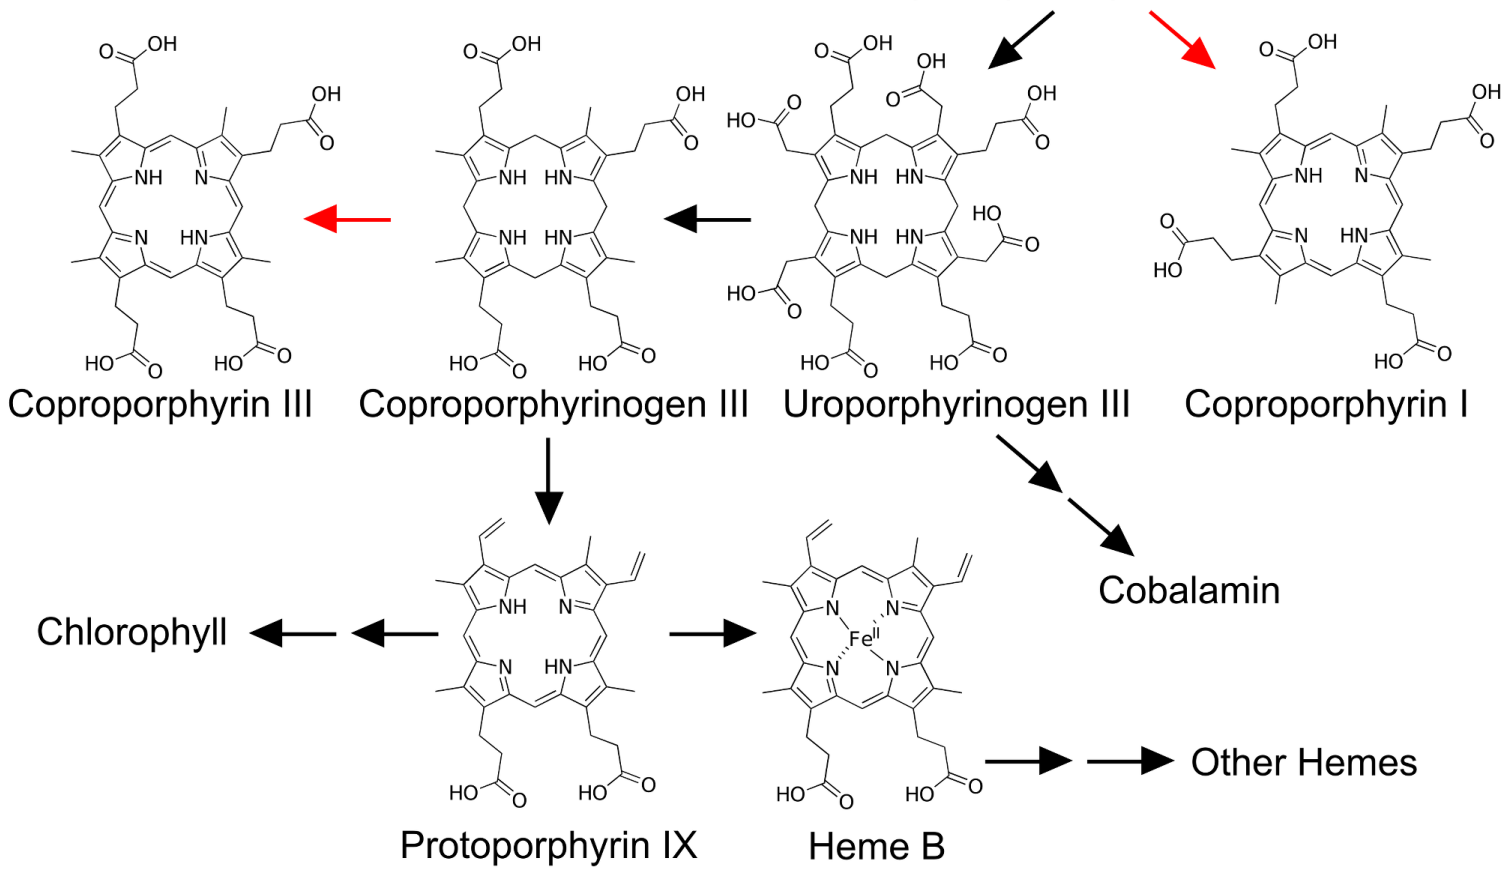

Supplement: mbo004141915sf01.pdf [file mbo004141915sf01.pdf]

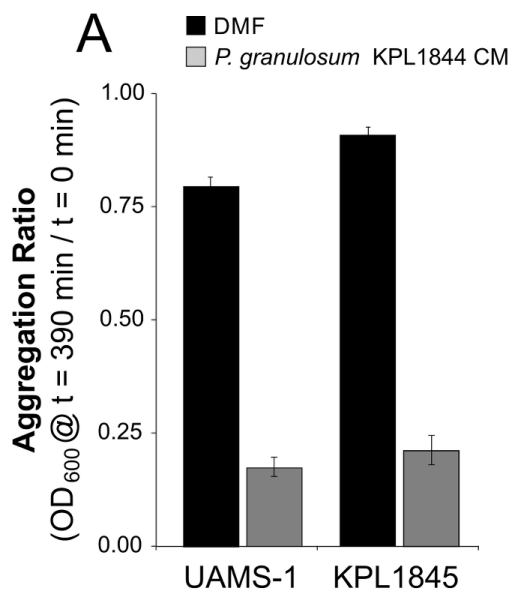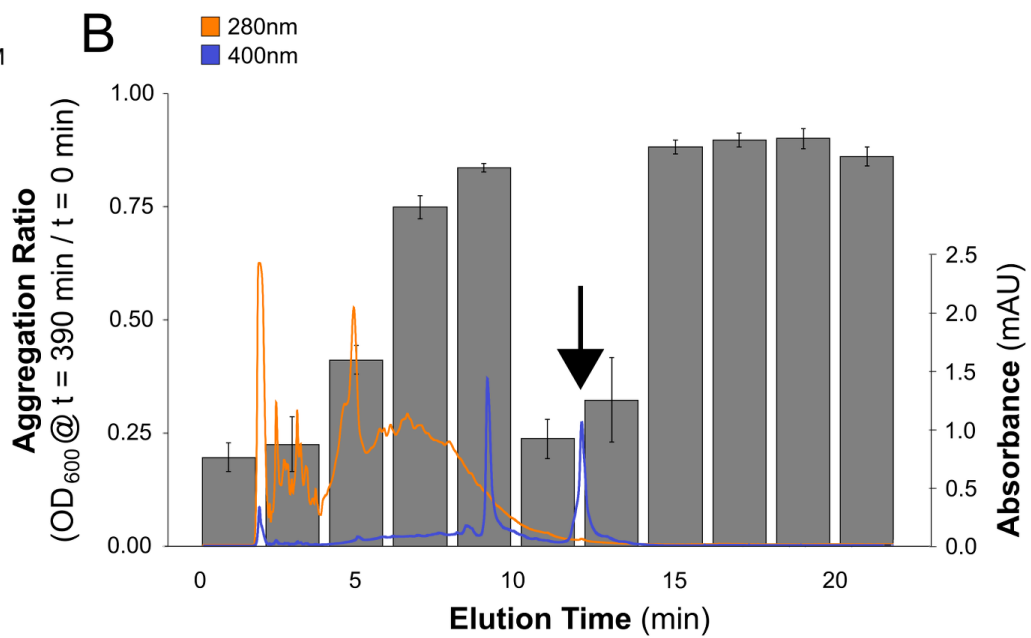

Supplement: mbo004141915sf02.pdf [file mbo004141915sf02.pdf]

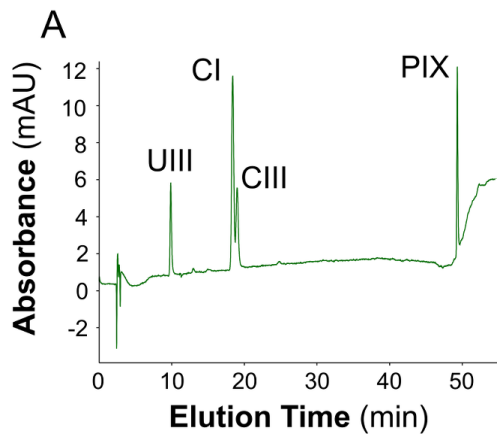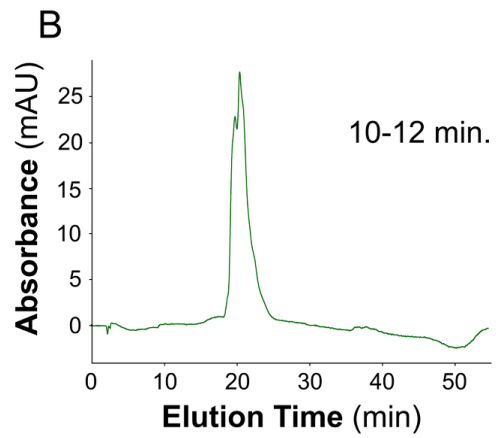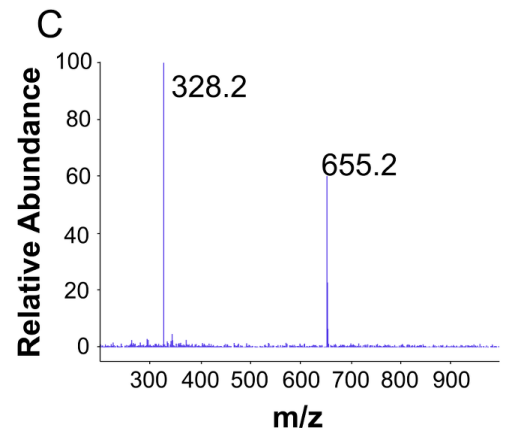

Supplement: mbo004141915sf03.pdf [file mbo004141915sf03.pdf]

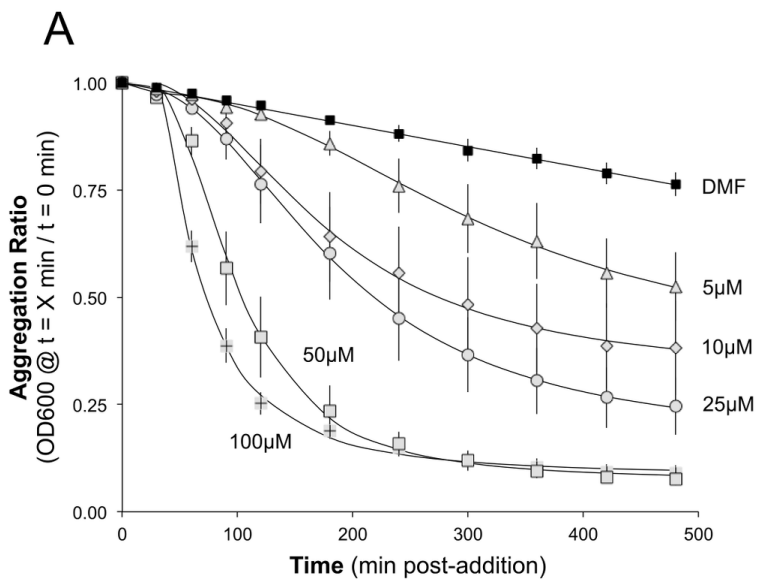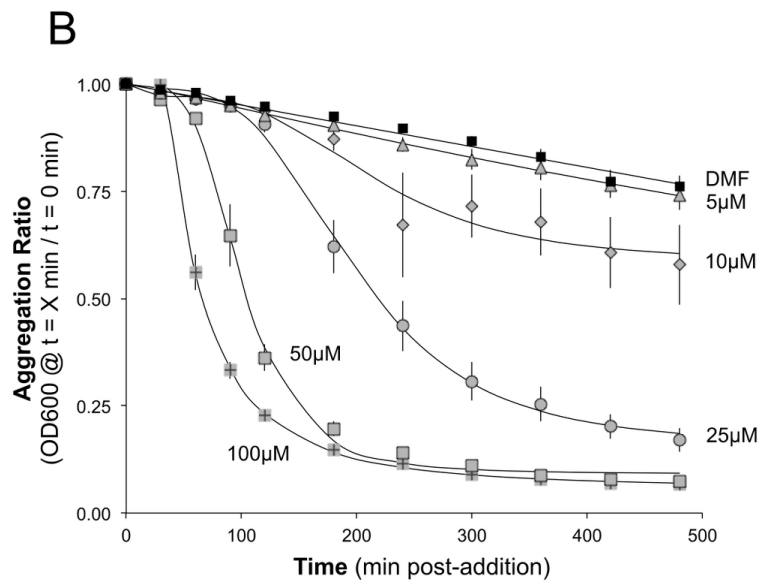

Supplement: mbo004141915sf04.pdf [file mbo004141915sf04.pdf]

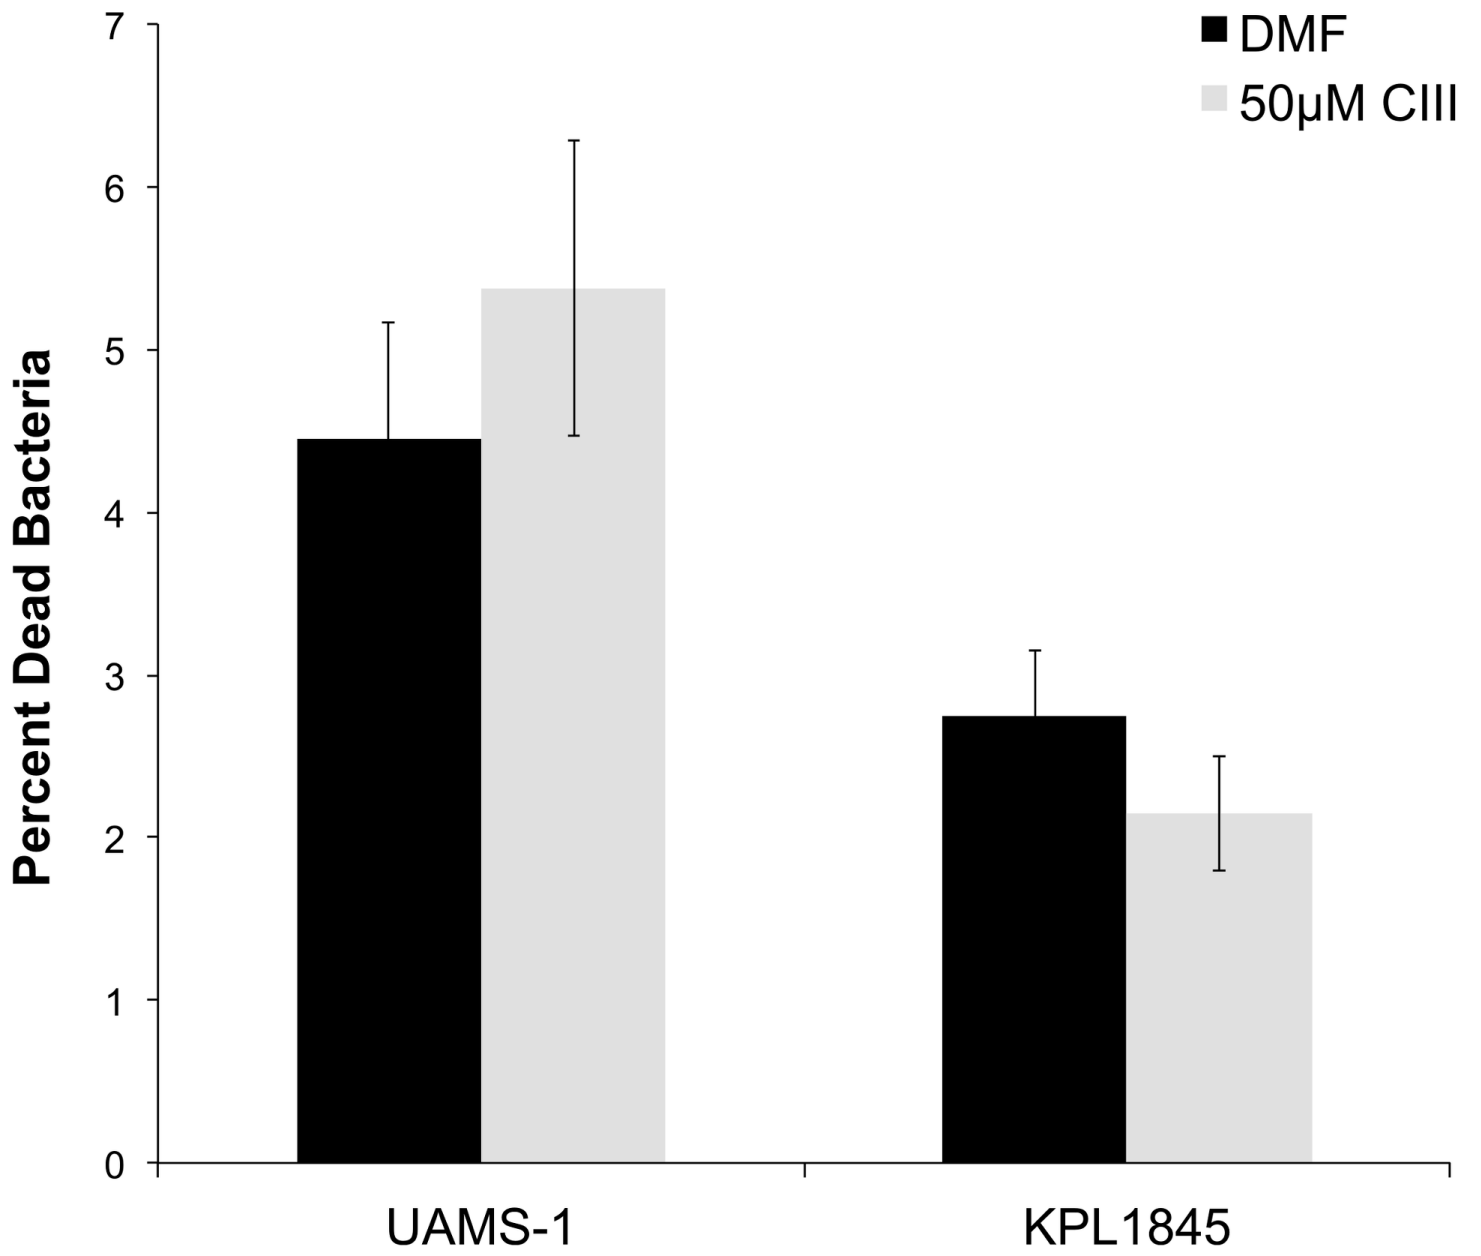

Supplement: mbo004141915sf05.pdf [file mbo004141915sf05.pdf]

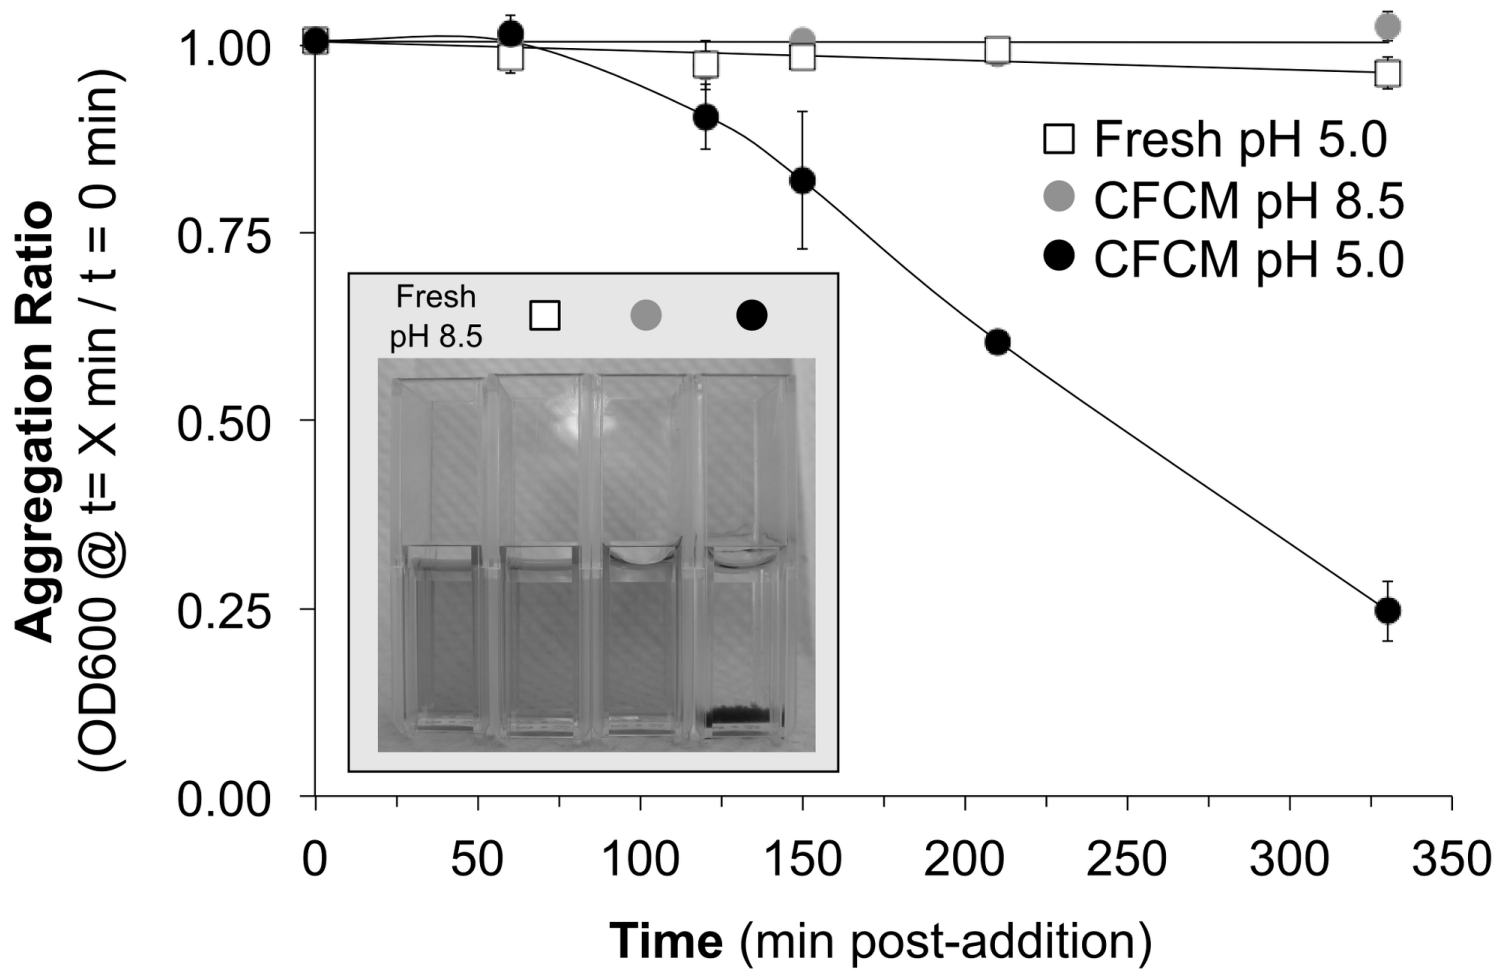

Supplement: mbo004141915sf06.pdf [file mbo004141915sf06.pdf]

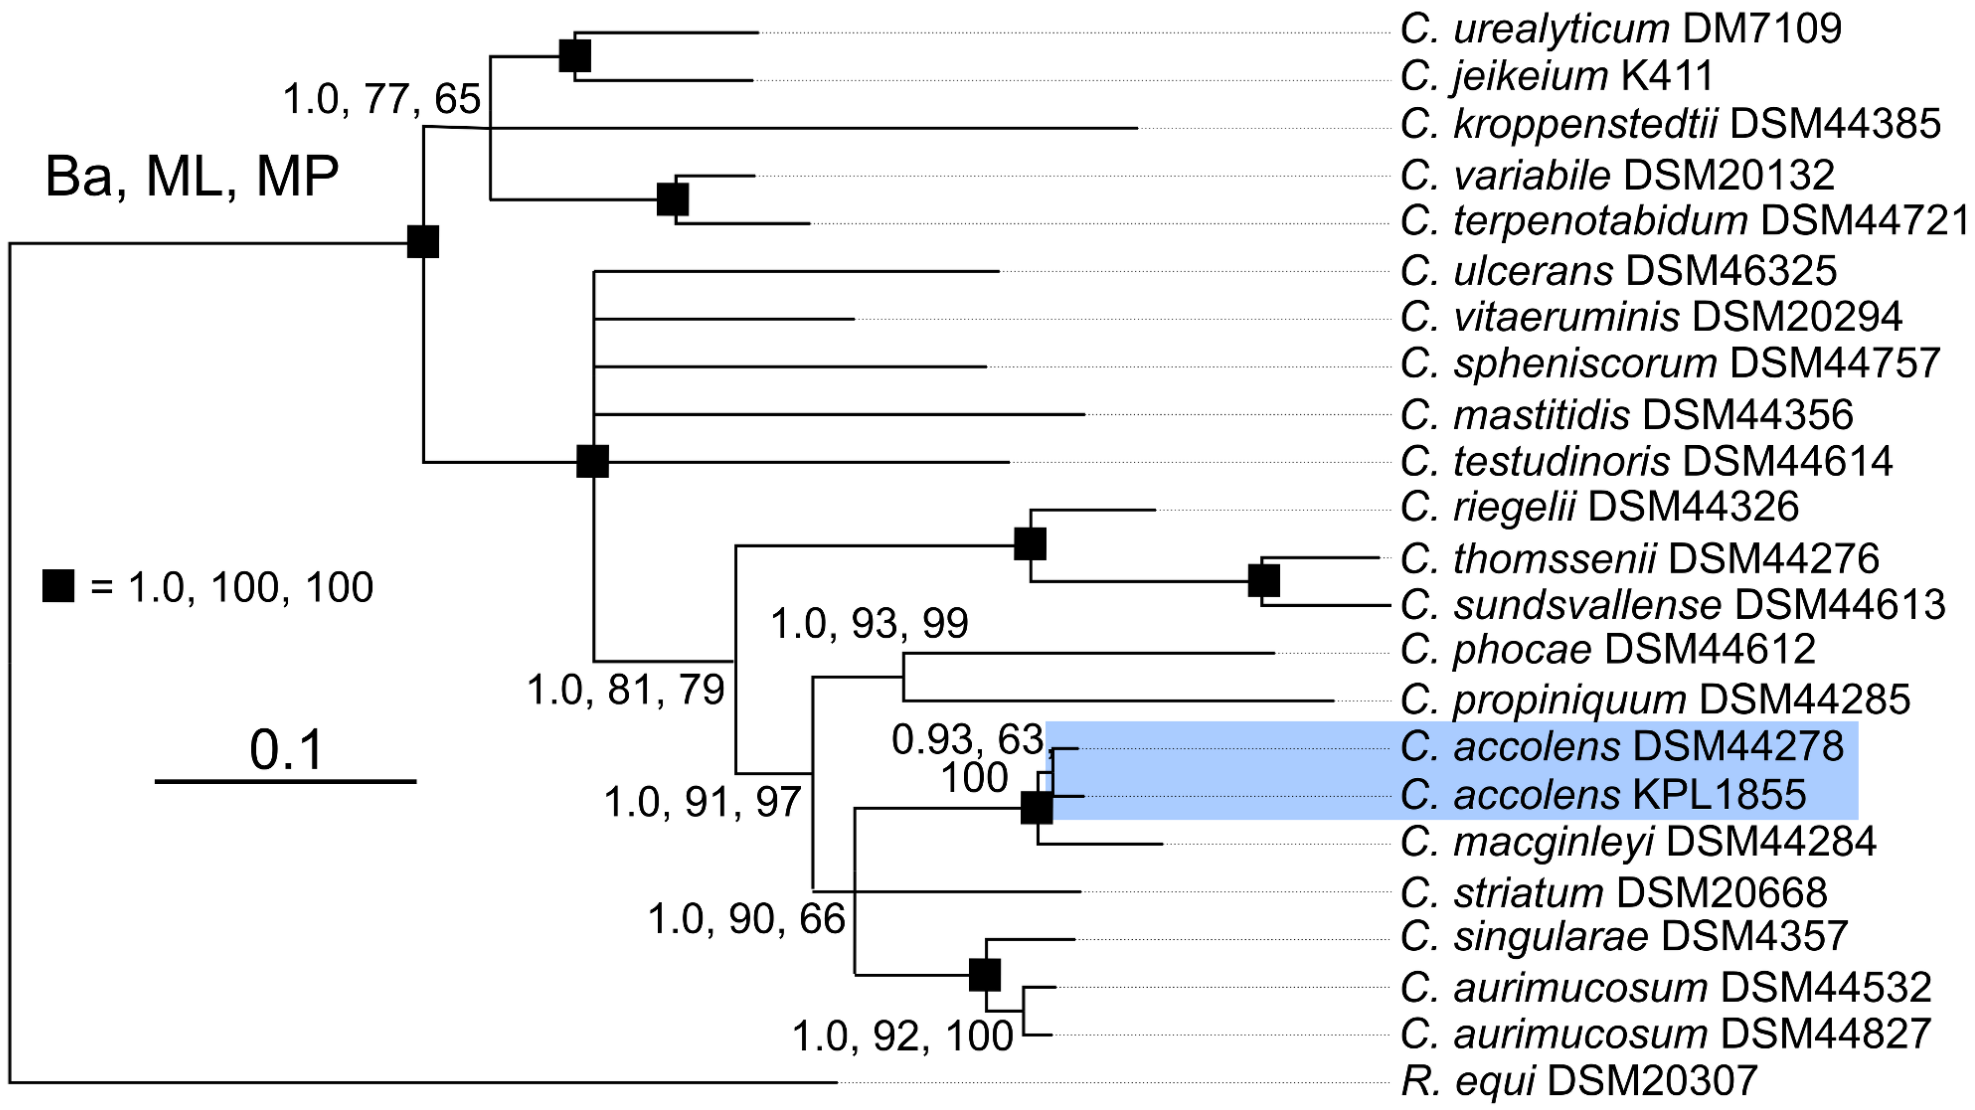

Supplement: mbo004141915sf07.pdf [file mbo004141915sf07.pdf]
